# Supplementary material for: Comparison of the hepatoprotection of intragastric and intravenous cyanidin-3-glucoside administration: focus on the key metabolites and gut microbiota modulation
Source: Royal Society of Chemistry journal article supplement (doi:10.1039/d4fo01608d), 2024-01-01
Supplement: d4fo01608d1.pdf [file d4fo01608d1.pdf]

**Table S1.** Sequence of primer in quantitative real-time PCR

| Genes | Forward primer (5'-3') | Reverse primers (5'-3') |
|-------|------------------------|-------------------------|
| Nrf2  | CAGCGACGGAAAGAGTATGA   | TGGGCAACCTGGGAGTAG      |
| HO-1  | TGCCAGTGCCACCAAGTTCAAG | TGTTGAGCAGGAACGCAGTCTG  |
| NQO-1 | TATCCTGCCGAGTCTGTTCTG  | AACTGGAATATCACAAGGTCTG  |
|       |                        | C                       |
| GAPDH | TCAACGGCACAGTCAAGG     | ACTCCACGACATACTCAG      |
